# Supplementary material for: Earth-Skimming Ultrahigh Energy Tau Neutrinos Simulated with Monte Carlo Method and CONEX Code
Source: Hindawi journal article supplement (doi:10.1155/2021/9987060), 2021-11-18
Supplement: f1 [file 9987060.f1.pdf]

**Figure 1, Survival probability of  $\tau$  leptons as function of the thickness of the mountain travelled from the point of creation of  $\tau$ , for five energies of the incident  $\nu_\tau$ :**

| Thickness(km) | P( $10^{16}$ eV) | P( $10^{17}$ eV) | P( $10^{18}$ eV) | P( $10^{19}$ eV) | P( $10^{20}$ eV) |
|---------------|------------------|------------------|------------------|------------------|------------------|
| 0,01          | 1                | 1                | 1                | 1                | 1                |
| 1             | 0,35294          | 0,31746          | 0,68605          | 0,94853          | 0,99678          |
| 2             | 0,08772          | 0,22297          | 0,37048          | 0,80593          | 0,97518          |
| 3             | 0,06316          | 0,13992          | 0,24797          | 0,63032          | 0,94575          |
| 4             | 0,04274          | 0,07233          | 0,20057          | 0,53142          | 0,90443          |
| 5             | 0,05464          | 0,05405          | 0,14027          | 0,42713          | 0,8382           |
| 6             | 0,07735          | 0,05134          | 0,12488          | 0,34144          | 0,76866          |
| 7             | 0,04128          | 0,0394           | 0,11701          | 0,28405          | 0,69776          |
| 8             | 0,04231          | 0,03987          | 0,1026           | 0,26791          | 0,62296          |
| 9             | 0,02098          | 0,03428          | 0,07624          | 0,23531          | 0,55214          |
| 10            | 0,02096          | 0,0203           | 0,07727          | 0,19841          | 0,48757          |
| 11            | 0,02601          | 0,03425          | 0,08246          | 0,1971           | 0,44665          |
| 12            | 0,03073          | 0,0245           | 0,0749           | 0,17104          | 0,39799          |
| 13            | 0,0119           | 0,03125          | 0,06143          | 0,15345          | 0,37419          |
| 14            | 0,01092          | 0,02579          | 0,05354          | 0,1576           | 0,34363          |
| 15            | 0,01242          | 0,02232          | 0,05149          | 0,1312           | 0,32013          |
| 16            | 0,01733          | 0,02103          | 0,04618          | 0,13633          | 0,29296          |
| 17            | 0,01358          | 0,01599          | 0,04562          | 0,11496          | 0,27801          |
| 18            | 0,01228          | 0,01752          | 0,04083          | 0,10989          | 0,26791          |
| 19            | 0,02187          | 0,01509          | 0,04085          | 0,1062           | 0,24673          |
| 20            | 0,00571          | 0,01621          | 0,04093          | 0,10854          | 0,23558          |
| 21            | 0,01102          | 0,01466          | 0,03853          | 0,0968           | 0,22247          |
| 22            | 0,02078          | 0,0176           | 0,03453          | 0,09173          | 0,21264          |
| 23            | 0,00877          | 0,01607          | 0,03529          | 0,08941          | 0,20273          |
| 24            | 0,01111          | 0,0122           | 0,0313           | 0,08423          | 0,18909          |
| 25            | 0,0095           | 0,01055          | 0,02467          | 0,08014          | 0,18067          |
| 26            | 0,00667          | 0,01147          | 0,03043          | 0,07483          | 0,1777           |
| 27            | 0,01003          | 0,01355          | 0,03148          | 0,07904          | 0,16813          |
| 28            | 0,00532          | 0,01544          | 0,0232           | 0,07669          | 0,16073          |
| 29            | 0,00717          | 0,00908          | 0,02225          | 0,06828          | 0,15534          |
| 30            | 0,01201          | 0,00639          | 0,02857          | 0,07018          | 0,14653          |

**Figure 2** Energy of the tau lepton produced by the incident  $\nu_\tau$  with an energy of  $10^{20}$  eV as function of the de la distance travelled in the rock:

| Position (km) | Energy of tau (eV) |
|---------------|--------------------|
| 21,5386       | 7,47038E19         |
| 21,5486       | 7,44089E19         |
| 21,5586       | 7,41152E19         |
| 21,5686       | 7,38229E19         |
| 21,5786       | 7,35318E19         |
| 21,5886       | 7,3242E19          |
| 21,5986       | 7,29534E19         |
| 21,6086       | 7,26661E19         |
| 21,6186       | 7,23801E19         |
| 21,6286       | 7,20953E19         |
| 21,6386       | 7,18117E19         |
| 21,6486       | 7,15294E19         |
| 21,6586       | 7,12483E19         |
| 21,6686       | 7,09684E19         |
| 21,6786       | 7,06897E19         |
| 21,6886       | 7,04122E19         |
| 21,6986       | 7,0136E19          |
| 21,7086       | 6,98609E19         |
| 21,7186       | 6,95871E19         |
| 21,7286       | 6,93144E19         |
| 21,7386       | 6,90429E19         |
| 21,7486       | 6,87726E19         |
| 21,7586       | 6,85034E19         |
| 21,7686       | 6,82354E19         |
| 21,7786       | 6,79686E19         |
| 21,7886       | 6,77029E19         |
| 21,7986       | 6,74384E19         |
| 21,8086       | 6,7175E19          |
| 21,8186       | 6,69128E19         |
| 21,8286       | 6,66517E19         |
| 21,8386       | 6,63917E19         |
| 21,8486       | 6,61328E19         |
| 21,8586       | 6,58751E19         |
| 21,8686       | 6,56184E19         |
| 21,8786       | 6,53629E19         |
| 21,8886       | 6,51085E19         |
| 21,8986       | 6,48551E19         |
| 21,9086       | 6,46029E19         |
| 21,9186       | 6,43517E19         |
| 21,9286       | 6,41017E19         |
| 21,9386       | 6,38526E19         |

|         |            |
|---------|------------|
| 21,9486 | 6,36047E19 |
| 21,9586 | 6,33578E19 |
| 21,9686 | 6,3112E19  |
| 21,9786 | 6,28673E19 |
| 21,9886 | 6,26236E19 |
| 21,9986 | 6,23809E19 |
| 22,0086 | 6,21393E19 |
| 22,0186 | 6,18987E19 |
| 22,0286 | 6,16592E19 |
| 22,0386 | 6,14207E19 |
| 22,0486 | 6,11832E19 |
| 22,0586 | 6,09467E19 |
| 22,0686 | 6,07112E19 |
| 22,0786 | 6,04767E19 |
| 22,0886 | 6,02433E19 |
| 22,0986 | 6,00108E19 |
| 22,1086 | 5,97793E19 |
| 22,1186 | 5,95488E19 |
| 22,1286 | 5,93193E19 |
| 22,1386 | 5,90908E19 |
| 22,1486 | 5,88633E19 |
| 22,1586 | 5,86367E19 |
| 22,1686 | 5,84111E19 |
| 22,1786 | 5,81864E19 |
| 22,1886 | 5,79628E19 |
| 22,1986 | 5,774E19   |
| 22,2086 | 5,75182E19 |
| 22,2186 | 5,72974E19 |
| 22,2286 | 5,70775E19 |
| 22,2386 | 5,68585E19 |
| 22,2486 | 5,66405E19 |
| 22,2586 | 5,64233E19 |
| 22,2686 | 5,62071E19 |
| 22,2786 | 5,59919E19 |
| 22,2886 | 5,57775E19 |
| 22,2986 | 5,5564E19  |
| 22,3086 | 5,53515E19 |
| 22,3186 | 5,51399E19 |
| 22,3286 | 5,49291E19 |
| 22,3386 | 5,47192E19 |
| 22,3486 | 5,45103E19 |
| 22,3586 | 5,43022E19 |
| 22,3686 | 5,4095E19  |
| 22,3786 | 5,38887E19 |
| 22,3886 | 5,36832E19 |
| 22,3986 | 5,34786E19 |

|         |            |
|---------|------------|
| 22,4086 | 5,32749E19 |
| 22,4186 | 5,3072E19  |
| 22,4286 | 5,287E19   |
| 22,4386 | 5,26689E19 |
| 22,4486 | 5,24686E19 |
| 22,4586 | 5,22691E19 |
| 22,4686 | 5,20705E19 |
| 22,4786 | 5,18727E19 |
| 22,4886 | 5,16757E19 |
| 22,4986 | 5,14796E19 |
| 22,5086 | 5,12843E19 |
| 22,5186 | 5,10899E19 |
| 22,5286 | 5,08962E19 |
| 22,5386 | 5,07034E19 |
| 22,5486 | 5,05113E19 |
| 22,5586 | 5,03201E19 |
| 22,5686 | 5,01297E19 |
| 22,5786 | 4,99401E19 |
| 22,5886 | 4,97512E19 |
| 22,5986 | 4,95632E19 |
| 22,6086 | 4,93759E19 |
| 22,6186 | 4,91895E19 |
| 22,6286 | 4,90038E19 |
| 22,6386 | 4,88189E19 |
| 22,6486 | 4,86348E19 |
| 22,6586 | 4,84514E19 |
| 22,6686 | 4,82688E19 |
| 22,6786 | 4,8087E19  |
| 22,6886 | 4,79059E19 |
| 22,6986 | 4,77256E19 |
| 22,7086 | 4,75461E19 |
| 22,7186 | 4,73673E19 |
| 22,7286 | 4,71892E19 |
| 22,7386 | 4,70119E19 |
| 22,7486 | 4,68353E19 |
| 22,7586 | 4,66595E19 |
| 22,7686 | 4,64843E19 |
| 22,7786 | 4,631E19   |
| 22,7886 | 4,61363E19 |
| 22,7986 | 4,59634E19 |
| 22,8086 | 4,57912E19 |
| 22,8186 | 4,56197E19 |
| 22,8286 | 4,54489E19 |
| 22,8386 | 4,52788E19 |
| 22,8486 | 4,51095E19 |
| 22,8586 | 4,49408E19 |

|         |            |
|---------|------------|
| 22,8686 | 4,47728E19 |
| 22,8786 | 4,46056E19 |
| 22,8886 | 4,4439E19  |
| 22,8986 | 4,42731E19 |
| 22,9086 | 4,41079E19 |
| 22,9186 | 4,39434E19 |
| 22,9286 | 4,37796E19 |
| 22,9386 | 4,36165E19 |
| 22,9486 | 4,3454E19  |
| 22,9586 | 4,32922E19 |
| 22,9686 | 4,31311E19 |
| 22,9786 | 4,29706E19 |
| 22,9886 | 4,28108E19 |
| 22,9986 | 4,26517E19 |
| 23,0086 | 4,24932E19 |
| 23,0186 | 4,23354E19 |
| 23,0286 | 4,21782E19 |
| 23,0386 | 4,20217E19 |
| 23,0486 | 4,18658E19 |
| 23,0586 | 4,17105E19 |
| 23,0686 | 4,15559E19 |
| 23,0786 | 4,1402E19  |
| 23,0886 | 4,12487E19 |
| 23,0986 | 4,1096E19  |
| 23,1086 | 4,09439E19 |
| 23,1186 | 4,07924E19 |
| 23,1286 | 4,06416E19 |
| 23,1386 | 4,04914E19 |
| 23,1486 | 4,03418E19 |
| 23,1586 | 4,01929E19 |
| 23,1686 | 4,00445E19 |
| 23,1786 | 3,98968E19 |
| 23,1886 | 3,97496E19 |
| 23,1986 | 3,96031E19 |
| 23,2086 | 3,94572E19 |
| 23,2186 | 3,93118E19 |
| 23,2286 | 3,91671E19 |
| 23,2386 | 3,90229E19 |
| 23,2486 | 3,88794E19 |
| 23,2586 | 3,87364E19 |
| 23,2686 | 3,8594E19  |
| 23,2786 | 3,84522E19 |
| 23,2886 | 3,8311E19  |
| 23,2986 | 3,81703E19 |
| 23,3086 | 3,80303E19 |
| 23,3186 | 3,78908E19 |

|         |            |
|---------|------------|
| 23,3286 | 3,77518E19 |
| 23,3386 | 3,76135E19 |
| 23,3486 | 3,74757E19 |
| 23,3586 | 3,73384E19 |
| 23,3686 | 3,72017E19 |
| 23,3786 | 3,70656E19 |
| 23,3886 | 3,693E19   |
| 23,3986 | 3,6795E19  |
| 23,4086 | 3,66606E19 |
| 23,4186 | 3,65266E19 |
| 23,4286 | 3,63933E19 |
| 23,4386 | 3,62604E19 |
| 23,4486 | 3,61281E19 |
| 23,4586 | 3,59964E19 |
| 23,4686 | 3,58652E19 |
| 23,4786 | 3,57345E19 |
| 23,4886 | 3,56043E19 |
| 23,4986 | 3,54747E19 |
| 23,5086 | 3,53456E19 |
| 23,5186 | 3,5217E19  |
| 23,5286 | 3,50889E19 |
| 23,5386 | 3,49614E19 |
| 23,5486 | 3,48344E19 |
| 23,5586 | 3,47079E19 |
| 23,5686 | 3,45819E19 |
| 23,5786 | 3,44564E19 |
| 23,5886 | 3,43314E19 |
| 23,5986 | 3,42069E19 |
| 23,6086 | 3,40829E19 |
| 23,6186 | 3,39595E19 |
| 23,6286 | 3,38365E19 |
| 23,6386 | 3,3714E19  |
| 23,6486 | 3,3592E19  |
| 23,6586 | 3,34705E19 |
| 23,6686 | 3,33495E19 |
| 23,6786 | 3,3229E19  |
| 23,6886 | 3,3109E19  |
| 23,6986 | 3,29894E19 |
| 23,7086 | 3,28703E19 |
| 23,7186 | 3,27518E19 |
| 23,7286 | 3,26336E19 |
| 23,7386 | 3,2516E19  |
| 23,7486 | 3,23988E19 |
| 23,7586 | 3,22822E19 |
| 23,7686 | 3,21659E19 |
| 23,7786 | 3,20502E19 |

|         |            |
|---------|------------|
| 23,7886 | 3,19349E19 |
| 23,7986 | 3,182E19   |
| 23,8086 | 3,17057E19 |
| 23,8186 | 3,15918E19 |
| 23,8286 | 3,14783E19 |
| 23,8386 | 3,13653E19 |
| 23,8486 | 3,12528E19 |
| 23,8586 | 3,11407E19 |
| 23,8686 | 3,1029E19  |
| 23,8786 | 3,09178E19 |
| 23,8886 | 3,0807E19  |
| 23,8986 | 3,06967E19 |
| 23,9086 | 3,05868E19 |
| 23,9186 | 3,04774E19 |
| 23,9286 | 3,03684E19 |
| 23,9386 | 3,02598E19 |
| 23,9486 | 3,01517E19 |
| 23,9586 | 3,0044E19  |
| 23,9686 | 2,99367E19 |
| 23,9786 | 2,98299E19 |
| 23,9886 | 2,97235E19 |
| 23,9986 | 2,96175E19 |
| 24,0086 | 2,95119E19 |
| 24,0186 | 2,94068E19 |
| 24,0286 | 2,9302E19  |
| 24,0386 | 2,91977E19 |
| 24,0486 | 2,90938E19 |
| 24,0586 | 2,89903E19 |
| 24,0686 | 2,88872E19 |
| 24,0786 | 2,87845E19 |
| 24,0886 | 2,86823E19 |
| 24,0986 | 2,85804E19 |
| 24,1086 | 2,8479E19  |
| 24,1186 | 2,83779E19 |
| 24,1286 | 2,82773E19 |
| 24,1386 | 2,8177E19  |
| 24,1486 | 2,80772E19 |
| 24,1586 | 2,79777E19 |
| 24,1686 | 2,78786E19 |
| 24,1786 | 2,77799E19 |
| 24,1886 | 2,76817E19 |
| 24,1986 | 2,75838E19 |
| 24,2086 | 2,74863E19 |
| 24,2186 | 2,73891E19 |
| 24,2286 | 2,72924E19 |
| 24,2386 | 2,7196E19  |

|         |            |
|---------|------------|
| 24,2486 | 2,71E19    |
| 24,2586 | 2,70044E19 |
| 24,2686 | 2,69092E19 |
| 24,2786 | 2,68144E19 |
| 24,2886 | 2,67199E19 |
| 24,2986 | 2,66258E19 |
| 24,3086 | 2,6532E19  |
| 24,3186 | 2,64387E19 |
| 24,3286 | 2,63457E19 |
| 24,3386 | 2,62531E19 |
| 24,3486 | 2,61608E19 |
| 24,3586 | 2,60689E19 |
| 24,3686 | 2,59773E19 |
| 24,3786 | 2,58861E19 |
| 24,3886 | 2,57953E19 |
| 24,3986 | 2,57048E19 |
| 24,4086 | 2,56147E19 |
| 24,4186 | 2,5525E19  |
| 24,4286 | 2,54356E19 |
| 24,4386 | 2,53465E19 |
| 24,4486 | 2,52578E19 |
| 24,4586 | 2,51694E19 |
| 24,4686 | 2,50814E19 |
| 24,4786 | 2,49937E19 |
| 24,4886 | 2,49064E19 |
| 24,4986 | 2,48194E19 |
| 24,5086 | 2,47327E19 |
| 24,5186 | 2,46464E19 |
| 24,5286 | 2,45604E19 |
| 24,5386 | 2,44748E19 |
| 24,5486 | 2,43895E19 |
| 24,5586 | 2,43045E19 |
| 24,5686 | 2,42199E19 |
| 24,5786 | 2,41356E19 |
| 24,5886 | 2,40516E19 |
| 24,5986 | 2,39679E19 |
| 24,6086 | 2,38846E19 |
| 24,6186 | 2,38016E19 |
| 24,6286 | 2,37189E19 |
| 24,6386 | 2,36365E19 |
| 24,6486 | 2,35545E19 |
| 24,6586 | 2,34728E19 |
| 24,6686 | 2,33913E19 |
| 24,6786 | 2,33103E19 |
| 24,6886 | 2,32295E19 |
| 24,6986 | 2,3149E19  |



|         |            |
|---------|------------|
| 24,7086 | 2,30689E19 |
| 24,7186 | 2,2989E19  |
| 24,7286 | 2,29095E19 |
| 24,7386 | 2,28303E19 |
| 24,7486 | 2,27513E19 |
| 24,7586 | 2,26727E19 |
| 24,7686 | 2,25944E19 |
| 24,7786 | 2,25164E19 |
| 24,7886 | 2,24387E19 |
| 24,7986 | 2,23613E19 |
| 24,8086 | 2,22842E19 |
| 24,8186 | 2,22074E19 |
| 24,8286 | 2,21309E19 |
| 24,8386 | 2,20547E19 |
| 24,8486 | 2,19788E19 |
| 24,8586 | 2,19031E19 |
| 24,8686 | 2,18278E19 |
| 24,8786 | 2,17527E19 |
| 24,8886 | 2,1678E19  |
| 24,8986 | 2,16035E19 |
| 24,9086 | 2,15293E19 |
| 24,9186 | 2,14554E19 |
| 24,9286 | 2,13818E19 |
| 24,9386 | 2,13085E19 |
| 24,9486 | 2,12355E19 |
| 24,9586 | 2,11627E19 |
| 24,9686 | 2,10902E19 |
| 24,9786 | 2,1018E19  |
| 24,9886 | 2,09461E19 |
| 24,9986 | 2,08744E19 |
| 25,0086 | 2,0803E19  |

**Figure 3** Number of  $\tau$  (emerging with black color and decaying with red color) as function of the rock length for the tau neutrino energy to  $10^{19}$  eV for different values of the valley widths (3, 5, 8 et 10 km):

**The value of the valley widths 3 km :**

| Rock length | Taus emerging | Taus decaying |
|-------------|---------------|---------------|
| 1           | 398           | 145           |
| 2           | 755           | 389           |
| 3           | 1027          | 558           |
| 4           | 1215          | 772           |
| 5           | 1339          | 860           |
| 6           | 1443          | 943           |
| 7           | 1434          | 982           |

|    |      |     |
|----|------|-----|
| 8  | 1450 | 939 |
| 9  | 1488 | 991 |
| 10 | 1411 | 950 |
| 11 | 1480 | 964 |
| 12 | 1394 | 967 |
| 13 | 1325 | 868 |
| 14 | 1351 | 870 |
| 15 | 1417 | 925 |
| 16 | 1408 | 953 |
| 17 | 1383 | 919 |
| 18 | 1430 | 949 |
| 19 | 1467 | 951 |
| 20 | 1401 | 948 |
| 21 | 1358 | 898 |
| 22 | 1333 | 878 |
| 23 | 1324 | 887 |
| 24 | 1373 | 906 |
| 25 | 1282 | 880 |
| 26 | 1357 | 935 |
| 27 | 1353 | 920 |
| 28 | 1307 | 868 |
| 29 | 1314 | 894 |
| 30 | 1314 | 869 |

**The value of the valley widths 5 km :**

| <b>Rock length</b> | <b>Taus emerging</b> | <b>Taus decaying</b> |
|--------------------|----------------------|----------------------|
| 1                  | 382                  | 273                  |
| 2                  | 747                  | 567                  |
| 3                  | 1026                 | 843                  |
| 4                  | 1230                 | 1049                 |
| 5                  | 1388                 | 1183                 |
| 6                  | 1459                 | 1279                 |
| 7                  | 1414                 | 1250                 |
| 8                  | 1417                 | 1237                 |
| 9                  | 1473                 | 1286                 |
| 10                 | 1423                 | 1238                 |
| 11                 | 1371                 | 1176                 |
| 12                 | 1453                 | 1255                 |
| 13                 | 1408                 | 1219                 |
| 14                 | 1372                 | 1201                 |
| 15                 | 1357                 | 1173                 |
| 16                 | 1440                 | 1272                 |
| 17                 | 1417                 | 1234                 |
| 18                 | 1348                 | 1184                 |
| 19                 | 1406                 | 1211                 |

|    |      |      |
|----|------|------|
| 20 | 1367 | 1194 |
| 21 | 1411 | 1240 |
| 22 | 1370 | 1196 |
| 23 | 1345 | 1194 |
| 24 | 1383 | 1205 |
| 25 | 1357 | 1190 |
| 26 | 1334 | 1176 |
| 27 | 1405 | 1222 |
| 28 | 1358 | 1202 |
| 29 | 1253 | 1081 |
| 30 | 1358 | 1148 |

**The value of the valley widths 10 km :**

| <b>Rock length</b> | <b>Taus emerging</b> | <b>Taus decaying</b> |
|--------------------|----------------------|----------------------|
| 1                  | 386                  | 380                  |
| 2                  | 702                  | 698                  |
| 3                  | 1023                 | 1014                 |
| 4                  | 1301                 | 1296                 |
| 5                  | 1409                 | 1408                 |
| 6                  | 1421                 | 1415                 |
| 7                  | 1438                 | 1433                 |
| 8                  | 1411                 | 1408                 |
| 9                  | 1447                 | 1440                 |
| 10                 | 1430                 | 1427                 |
| 11                 | 1449                 | 1445                 |
| 12                 | 1483                 | 1482                 |
| 13                 | 1429                 | 1422                 |
| 14                 | 1434                 | 1433                 |
| 15                 | 1382                 | 1380                 |
| 16                 | 1397                 | 1392                 |
| 17                 | 1407                 | 1398                 |
| 18                 | 1355                 | 1349                 |
| 19                 | 1390                 | 1380                 |
| 20                 | 1336                 | 1329                 |
| 21                 | 1371                 | 1364                 |
| 22                 | 1328                 | 1326                 |
| 23                 | 1345                 | 1343                 |
| 24                 | 1351                 | 1345                 |
| 25                 | 1358                 | 1354                 |
| 26                 | 1343                 | 1340                 |
| 27                 | 1386                 | 1381                 |
| 28                 | 1295                 | 1289                 |
| 29                 | 1320                 | 1316                 |
| 30                 | 1400                 | 1393                 |

**Figure 4** Number of  $\tau$  (emerging with black color and decaying with red color) as function of the rock length for the tau neutrino energy to  $10^{18}$  eV for the valley widths 3 km:

| Rock length | Taus emerging | Taus decaying |
|-------------|---------------|---------------|
| 1           | 169           | 166           |
| 2           | 245           | 244           |
| 3           | 256           | 250           |
| 4           | 251           | 246           |
| 5           | 276           | 274           |
| 6           | 272           | 268           |
| 7           | 263           | 263           |
| 8           | 268           | 265           |
| 9           | 259           | 255           |
| 10          | 261           | 258           |
| 11          | 279           | 269           |
| 12          | 247           | 243           |
| 13          | 261           | 260           |
| 14          | 290           | 286           |
| 15          | 274           | 267           |
| 16          | 266           | 266           |
| 17          | 252           | 249           |
| 18          | 277           | 273           |
| 19          | 285           | 283           |
| 20          | 240           | 239           |
| 21          | 253           | 251           |
| 22          | 256           | 251           |
| 23          | 243           | 240           |
| 24          | 262           | 259           |
| 25          | 249           | 244           |
| 26          | 240           | 236           |
| 27          | 269           | 263           |
| 28          | 251           | 249           |
| 29          | 226           | 222           |
| 30          | 257           | 253           |

**Figure 5** Number of  $\tau$  (emerging with black color and decaying with red color) as function of the rock length for the tau neutrino energy to  $10^{20}$  eV for different values of the valley widths (5, 10, 15 et 20 km):

**The value of the valley widths 5 km :**

| Rock length | Taus emerging | Taus decaying |
|-------------|---------------|---------------|
| 1           | 845           | 95            |

|    |      |      |
|----|------|------|
| 2  | 1672 | 255  |
| 3  | 2613 | 541  |
| 4  | 3376 | 849  |
| 5  | 4104 | 1253 |
| 6  | 4881 | 1788 |
| 7  | 5352 | 2239 |
| 8  | 5787 | 2720 |
| 9  | 5969 | 2923 |
| 10 | 6185 | 3168 |
| 11 | 6261 | 3234 |
| 12 | 6276 | 3382 |
| 13 | 6327 | 3401 |
| 14 | 6241 | 3285 |
| 15 | 6338 | 3268 |
| 16 | 6252 | 3292 |
| 17 | 6088 | 3267 |
| 18 | 5993 | 3206 |
| 19 | 6144 | 3231 |
| 20 | 5898 | 3143 |
| 21 | 5875 | 3057 |
| 22 | 5915 | 3141 |
| 23 | 5795 | 3135 |
| 24 | 5696 | 2988 |
| 25 | 5744 | 3051 |
| 26 | 5679 | 3005 |
| 27 | 5627 | 2993 |
| 28 | 5570 | 2960 |
| 29 | 5392 | 2852 |
| 30 | 5486 | 2885 |

**The value of the valley widths 10 km :**

| <b>rock length</b> | <b>Taus emerging</b> | <b>Taus decaying</b> |
|--------------------|----------------------|----------------------|
| 1                  | 917                  | 326                  |
| 2                  | 1702                 | 771                  |
| 3                  | 2590                 | 1345                 |
| 4                  | 3322                 | 1969                 |
| 5                  | 3993                 | 2626                 |
| 6                  | 4655                 | 3209                 |
| 7                  | 5342                 | 3887                 |
| 8                  | 5821                 | 4391                 |
| 9                  | 6098                 | 4703                 |
| 10                 | 6276                 | 4947                 |
| 11                 | 6361                 | 4970                 |

|    |      |      |
|----|------|------|
| 12 | 6303 | 4975 |
| 13 | 6272 | 4954 |
| 14 | 6364 | 5055 |
| 15 | 6098 | 4785 |
| 16 | 6124 | 4775 |
| 17 | 6141 | 4808 |
| 18 | 6074 | 4706 |
| 19 | 6061 | 4783 |
| 20 | 5767 | 4508 |
| 21 | 5857 | 4595 |
| 22 | 5897 | 4649 |
| 23 | 5908 | 4592 |
| 24 | 5815 | 4572 |
| 25 | 5640 | 4451 |
| 26 | 5818 | 4562 |
| 27 | 5611 | 4492 |
| 28 | 5520 | 4273 |
| 29 | 5415 | 4245 |
| 30 | 5371 | 4170 |

**The value of the valley widths 15 km :**

| Largeur | tausurvie | taudev |
|---------|-----------|--------|
| 1       | 66        | 41     |
| 2       | 177       | 129    |
| 3       | 253       | 200    |
| 4       | 314       | 248    |
| 5       | 407       | 355    |
| 6       | 474       | 409    |
| 7       | 522       | 456    |
| 8       | 583       | 528    |
| 9       | 575       | 519    |
| 10      | 612       | 554    |
| 11      | 661       | 604    |
| 12      | 624       | 571    |
| 13      | 610       | 545    |
| 14      | 635       | 571    |
| 15      | 648       | 586    |
| 16      | 615       | 544    |
| 17      | 604       | 549    |
| 18      | 645       | 590    |
| 19      | 596       | 540    |
| 20      | 604       | 548    |
| 21      | 574       | 523    |
| 22      | 574       | 530    |
| 23      | 559       | 510    |

|    |     |     |
|----|-----|-----|
| 24 | 613 | 548 |
| 25 | 600 | 540 |
| 26 | 567 | 519 |
| 27 | 574 | 517 |
| 28 | 556 | 508 |
| 29 | 621 | 557 |
| 30 | 532 | 473 |

**The value of the valley widths 20 km :**

| <b>Rock length</b> | <b>Taus emerging</b> | <b>Taus decaying</b> |
|--------------------|----------------------|----------------------|
| 1                  | 99                   | 79                   |
| 2                  | 192                  | 164                  |
| 3                  | 259                  | 240                  |
| 4                  | 349                  | 323                  |
| 5                  | 402                  | 389                  |
| 6                  | 480                  | 445                  |
| 7                  | 545                  | 518                  |
| 8                  | 553                  | 541                  |
| 9                  | 588                  | 565                  |
| 10                 | 648                  | 619                  |
| 11                 | 673                  | 650                  |
| 12                 | 649                  | 631                  |
| 13                 | 631                  | 617                  |
| 14                 | 656                  | 633                  |
| 15                 | 625                  | 595                  |
| 16                 | 618                  | 601                  |
| 17                 | 585                  | 564                  |
| 18                 | 603                  | 581                  |
| 19                 | 640                  | 615                  |
| 20                 | 629                  | 605                  |
| 21                 | 617                  | 598                  |
| 22                 | 556                  | 542                  |
| 23                 | 568                  | 542                  |
| 24                 | 569                  | 544                  |
| 25                 | 558                  | 536                  |
| 26                 | 552                  | 534                  |
| 27                 | 611                  | 587                  |
| 28                 | 547                  | 529                  |
| 29                 | 550                  | 536                  |
| 30                 | 543                  | 528                  |

**Figure 6** Distribution normalisée des muons de la gerbe initiée par un lepton tau en fonction de la hauteur pour les différentes valeurs de l'énergie et pour les trois valeurs de  $\theta$  ( 70, 75 et 80 ) :

| 10 <sup>6</sup> GeV |         | 10 <sup>7</sup> GeV |         | 10 <sup>8</sup> GeV |         | 10 <sup>9</sup> GeV |         |
|---------------------|---------|---------------------|---------|---------------------|---------|---------------------|---------|
| Height(m)           | ang=70° | Height(m)           | ang=70° | Height(m)           | ang=70° | Height(m)           | ang=70° |
| 90808,32085         | 0,00111 | 81789,98912         | 0,00158 | 81789,98912         | 0,00218 | 84816,71479         | 0,00141 |
| 88501,21717         | 0,0025  | 78772,56174         | 0,00425 | 78772,56174         | 0,00462 | 81789,98912         | 0,00318 |
| 86199,57271         | 0,00361 | 75764,37566         | 0,01189 | 75764,37566         | 0,01052 | 78772,56174         | 0,00612 |
| 83903,36166         | 0,00804 | 72765,37442         | 0,02475 | 72765,37442         | 0,02005 | 75764,37566         | 0,01036 |
| 81612,55844         | 0,01664 | 69775,50205         | 0,0415  | 69775,50205         | 0,03338 | 72765,37442         | 0,01711 |
| 79327,13761         | 0,03245 | 66794,70311         | 0,06322 | 66794,70311         | 0,05217 | 69775,50205         | 0,02653 |
| 77047,07395         | 0,05381 | 63822,92267         | 0,08773 | 63822,92267         | 0,0736  | 66794,70311         | 0,0391  |
| 74772,34238         | 0,07129 | 60860,10628         | 0,11334 | 60860,10628         | 0,10063 | 63822,92267         | 0,05577 |
| 72502,91802         | 0,09043 | 57906,19999         | 0,14428 | 57906,19999         | 0,13295 | 60860,10628         | 0,07588 |
| 70238,77615         | 0,11567 | 54961,15034         | 0,1791  | 54961,15034         | 0,16751 | 57906,19999         | 0,09971 |
| 67979,89223         | 0,13842 | 52024,90433         | 0,21369 | 52024,90433         | 0,21004 | 54961,15034         | 0,12861 |
| 65726,24189         | 0,17032 | 49097,40948         | 0,25482 | 49097,40948         | 0,25687 | 52024,90433         | 0,16267 |
| 63477,80092         | 0,19917 | 46178,61372         | 0,30227 | 46178,61372         | 0,31053 | 49097,40948         | 0,2016  |
| 61234,5453          | 0,23689 | 43268,46548         | 0,36088 | 43268,46548         | 0,36701 | 46178,61372         | 0,24652 |
| 58996,45115         | 0,27656 | 40366,91365         | 0,42373 | 40366,91365         | 0,43023 | 43268,46548         | 0,29858 |
| 56763,49477         | 0,3215  | 37473,90756         | 0,50297 | 37473,90756         | 0,49819 | 40366,91365         | 0,35717 |
| 54535,65261         | 0,36422 | 34589,39698         | 0,59204 | 34589,39698         | 0,57122 | 37473,90756         | 0,42207 |
| 52312,9013          | 0,41831 | 31713,33213         | 0,67383 | 31713,33213         | 0,64462 | 34589,39698         | 0,49371 |
| 50095,21762         | 0,47989 | 28845,66367         | 0,7476  | 28845,66367         | 0,72377 | 31713,33213         | 0,57145 |
| 47882,57851         | 0,53426 | 25986,3427          | 0,8249  | 25986,3427          | 0,80426 | 28845,66367         | 0,65533 |
| 45674,96106         | 0,58419 | 23135,32072         | 0,89892 | 23135,32072         | 0,88416 | 25986,3427          | 0,7419  |
| 43472,34253         | 0,64438 | 20292,54968         | 0,95923 | 20292,54968         | 0,95082 | 23135,32072         | 0,829   |
| 41274,70032         | 0,7104  | 17457,98192         | 1       | 17457,98192         | 1       | 20292,54968         | 0,91402 |
| 39082,01199         | 0,76588 |                     |         |                     |         | 17457,98192         | 0,98085 |
| 36894,25525         | 0,82219 |                     |         |                     |         | 14631,57021         | 1       |
| 34711,40796         | 0,87351 |                     |         |                     |         |                     |         |
| 32533,44813         | 0,91234 |                     |         |                     |         |                     |         |
| 30360,35392         | 0,94092 |                     |         |                     |         |                     |         |
| 28192,10364         | 0,96117 |                     |         |                     |         |                     |         |
| 26028,67572         | 0,9828  |                     |         |                     |         |                     |         |
| 23870,04877         | 1       |                     |         |                     |         |                     |         |

| 10 <sup>6</sup> GeV |         | 10 <sup>7</sup> GeV |         | 10 <sup>8</sup> GeV |         | 10 <sup>9</sup> GeV |         |
|---------------------|---------|---------------------|---------|---------------------|---------|---------------------|---------|
| Height(m)           | ang=75° | Height(m)           | ang=75° | Height(m)           | ang=75° | Height(m)           | ang=75° |
| 92281,35444         | 0,00285 | 88501,21717         | 0,00122 | 86199,57271         | 0,00143 | 86199,57271         | 0,00101 |
| 90726,95864         | 0,00438 | 86199,57271         | 0,00315 | 83903,36166         | 0,00293 | 83903,36166         | 0,00216 |
| 89175,11097         | 0,00701 | 83903,36166         | 0,00578 | 81612,55844         | 0,00519 | 81612,55844         | 0,00423 |
| 87625,8031          | 0,01359 | 81612,55844         | 0,00925 | 79327,13761         | 0,0092  | 79327,13761         | 0,00703 |
| 86079,02675         | 0,02499 | 79327,13761         | 0,01348 | 77047,07395         | 0,01591 | 77047,07395         | 0,01105 |
| 84534,77367         | 0,03332 | 77047,07395         | 0,02029 | 74772,34238         | 0,0249  | 74772,34238         | 0,01628 |
| 82993,03565         | 0,05327 | 74772,34238         | 0,02735 | 72502,91802         | 0,03633 | 72502,91802         | 0,02306 |



|             |         |             |         |             |         |             |         |
|-------------|---------|-------------|---------|-------------|---------|-------------|---------|
| 81453,80452 | 0,07234 | 72502,91802 | 0,03628 | 70238,77615 | 0,05115 | 70238,77615 | 0,03177 |
| 79917,07217 | 0,09185 | 70238,77615 | 0,04764 | 67979,89223 | 0,06714 | 67979,89223 | 0,04231 |
| 78382,83051 | 0,11464 | 67979,89223 | 0,06138 | 65726,24189 | 0,08691 | 65726,24189 | 0,05563 |
| 76851,07147 | 0,13832 | 65726,24189 | 0,07949 | 63477,80092 | 0,10929 | 63477,80092 | 0,0721  |
| 75321,78707 | 0,16287 | 63477,80092 | 0,0999  | 61234,5453  | 0,13422 | 61234,5453  | 0,09138 |
| 73794,96932 | 0,1929  | 61234,5453  | 0,13027 | 58996,45115 | 0,16078 | 58996,45115 | 0,11341 |
| 72270,6103  | 0,22753 | 58996,45115 | 0,16045 | 56763,49477 | 0,19021 | 56763,49477 | 0,13916 |
| 70748,70211 | 0,26523 | 56763,49477 | 0,19339 | 54535,65261 | 0,22257 | 54535,65261 | 0,16764 |
| 69229,2369  | 0,2968  | 54535,65261 | 0,23236 | 52312,9013  | 0,25858 | 52312,9013  | 0,20001 |
| 67712,20684 | 0,32836 | 52312,9013  | 0,27897 | 50095,21762 | 0,29805 | 50095,21762 | 0,23604 |
| 66197,60417 | 0,37155 | 50095,21762 | 0,32648 | 47882,57851 | 0,34009 | 47882,57851 | 0,27597 |
| 64685,42113 | 0,39961 | 47882,57851 | 0,37393 | 45674,96106 | 0,38518 | 45674,96106 | 0,31998 |
| 63175,65001 | 0,42635 | 45674,96106 | 0,4253  | 43472,34253 | 0,43412 | 43472,34253 | 0,36792 |
| 61668,28316 | 0,45945 | 43472,34253 | 0,48096 | 41274,70032 | 0,48323 | 41274,70032 | 0,41974 |
| 60163,31294 | 0,49342 | 41274,70032 | 0,53432 | 39082,01199 | 0,53402 | 39082,01199 | 0,47451 |
| 58660,73174 | 0,53003 | 39082,01199 | 0,59095 | 36894,25525 | 0,58818 | 36894,25525 | 0,5317  |
| 54167,24691 | 0,63744 | 36894,25525 | 0,63923 | 34711,40796 | 0,64262 | 34711,40796 | 0,59064 |
| 52674,14659 | 0,67142 | 34711,40796 | 0,69271 | 32533,44813 | 0,69969 | 32533,44813 | 0,6511  |
| 51183,39785 | 0,70517 | 32533,44813 | 0,74876 | 30360,35392 | 0,75668 | 30360,35392 | 0,71207 |
| 49694,99331 | 0,72797 | 30360,35392 | 0,79974 | 28192,10364 | 0,81037 | 28192,10364 | 0,77246 |
| 48208,92562 | 0,7534  | 28192,10364 | 0,85335 | 26028,67572 | 0,86057 | 26028,67572 | 0,83147 |
| 46725,18747 | 0,78321 | 26028,67572 | 0,90119 | 23870,04877 | 0,9096  | 23870,04877 | 0,88647 |
| 42287,87761 | 0,84546 | 23870,04877 | 0,9451  | 21716,20151 | 0,95302 | 21716,20151 | 0,93547 |
| 40813,38514 | 0,86848 | 21716,20151 | 0,97425 | 19567,11282 | 0,98496 | 19567,11282 | 0,97549 |
| 39341,18616 | 0,89456 | 19567,11282 | 0,99518 | 17422,76172 | 1       | 17422,76172 | 1       |
| 37871,27353 | 0,91451 | 17422,76172 | 1       |             |         |             |         |
| 27645,3128  | 1       |             |         |             |         |             |         |
|             |         |             |         |             |         |             |         |

| 10 <sup>6</sup> GeV | ang=80° | 10 <sup>7</sup> GeV | ang=80° | 10 <sup>8</sup> GeV | ang=80° | 10 <sup>9</sup> GeV | ang=80° |
|---------------------|---------|---------------------|---------|---------------------|---------|---------------------|---------|
| Height(m)           | norm    | Height(m)           | norm    | Height(m)           | norm    | Height(m)           | norm    |
| 90726,95864         | 0,00151 | 90726,95864         | 0,00151 | 89175,11097         | 0,00199 | 89175,11097         | 0,0011  |
| 89175,11097         | 0,00303 | 89175,11097         | 0,00303 | 87625,8031          | 0,00395 | 87625,8031          | 0,00236 |
| 87625,8031          | 0,00662 | 87625,8031          | 0,00662 | 86079,02675         | 0,00686 | 86079,02675         | 0,00425 |
| 86079,02675         | 0,01137 | 86079,02675         | 0,01137 | 84534,77367         | 0,01065 | 84534,77367         | 0,0068  |
| 84534,77367         | 0,01853 | 84534,77367         | 0,01853 | 82993,03565         | 0,01518 | 79917,07217         | 0,01993 |
| 82993,03565         | 0,02717 | 82993,03565         | 0,02717 | 81453,80452         | 0,02035 | 78382,83051         | 0,02665 |
| 81453,80452         | 0,03776 | 81453,80452         | 0,03776 | 79917,07217         | 0,02643 | 76851,07147         | 0,0346  |
| 79917,07217         | 0,04836 | 79917,07217         | 0,04836 | 78382,83051         | 0,03337 | 75321,78707         | 0,04371 |
| 78382,83051         | 0,06255 | 78382,83051         | 0,06255 | 76851,07147         | 0,04106 | 73794,96932         | 0,05402 |
| 76851,07147         | 0,07771 | 76851,07147         | 0,07771 | 75321,78707         | 0,05024 | 72270,6103          | 0,06608 |
| 75321,78707         | 0,09708 | 75321,78707         | 0,09708 | 73794,96932         | 0,06093 | 70748,70211         | 0,07984 |
| 73794,96932         | 0,1187  | 73794,96932         | 0,1187  | 72270,6103          | 0,07312 | 69229,2369          | 0,09482 |
| 72270,6103          | 0,13992 | 72270,6103          | 0,13992 | 70748,70211         | 0,08586 | 67712,20684         | 0,11136 |
| 70748,70211         | 0,1637  | 70748,70211         | 0,1637  | 69229,2369          | 0,10036 | 66197,60417         | 0,12931 |
| 69229,2369          | 0,19117 | 69229,2369          | 0,19117 | 63175,65001         | 0,17075 | 54167,24691         | 0,32804 |
| 67712,20684         | 0,21763 | 67712,20684         | 0,21763 | 61668,28316         | 0,19215 | 52674,14659         | 0,35913 |
| 66197,60417         | 0,24531 | 66197,60417         | 0,24531 | 60163,31294         | 0,21457 | 51183,39785         | 0,39105 |
| 64685,42113         | 0,27655 | 64685,42113         | 0,27655 | 55662,70623         | 0,29397 | 49694,99331         | 0,42429 |
| 63175,65001         | 0,30829 | 63175,65001         | 0,30829 | 54167,24691         | 0,32312 | 48208,92562         | 0,45801 |
| 61668,28316         | 0,34444 | 61668,28316         | 0,34444 | 52674,14659         | 0,35432 | 42287,87761         | 0,59781 |
| 60163,31294         | 0,3781  | 52674,14659         | 0,55505 | 51183,39785         | 0,38643 | 40813,38514         | 0,63329 |

|             |         |             |         |             |         |             |         |
|-------------|---------|-------------|---------|-------------|---------|-------------|---------|
| 58660,73174 | 0,41038 | 51183,39785 | 0,5912  | 46725,18747 | 0,49169 | 39341,18616 | 0,66813 |
| 57160,53201 | 0,44539 | 49694,99331 | 0,6297  | 42287,87761 | 0,60268 | 37871,27353 | 0,7037  |
| 55662,70623 | 0,48463 | 48208,92562 | 0,6674  | 40813,38514 | 0,64015 | 30555,75923 | 0,8679  |
| 51183,39785 | 0,5912  | 46725,18747 | 0,7024  | 39341,18616 | 0,67713 | 29099,41727 | 0,89569 |
| 49694,99331 | 0,6297  | 45243,77158 | 0,73895 | 37871,27353 | 0,71425 | 27645,3128  | 0,92147 |
| 48208,92562 | 0,6674  | 43764,67069 | 0,7713  | 29099,41727 | 0,90855 | 26193,43898 | 0,94511 |
| 46725,18747 | 0,7024  | 42287,87761 | 0,80705 | 27645,3128  | 0,93288 | 24743,78897 | 0,96595 |
| 45243,77158 | 0,73895 | 40813,38514 | 0,8394  | 26193,43898 | 0,9548  | 23296,35599 | 0,98211 |
| 43764,67069 | 0,7713  | 39341,18616 | 0,86855 | 24743,78897 | 0,97275 | 21851,13328 | 0,99368 |
| 42287,87761 | 0,80705 | 37871,27353 | 0,89643 | 23296,35599 | 0,98769 | 20408,11411 | 1       |
| 40813,38514 | 0,8394  | 36403,64019 | 0,9232  | 21851,13328 | 0,9972  |             |         |
| 32014,34557 | 0,973   | 34938,27908 | 0,94095 | 20408,11411 | 1       |             |         |
| 30555,75923 | 0,98268 | 33475,1832  | 0,95753 |             |         |             |         |
| 29099,41727 | 0,99136 | 32014,34557 | 0,973   |             |         |             |         |
| 27645,3128  | 0,99445 | 30555,75923 | 0,98268 |             |         |             |         |
| 26193,43898 | 1       | 26193,43898 | 1       |             |         |             |         |

**Figure 7** Valeurs de  $L'_{max}$  en fonction de l'énergie du lepton tau pour les trois valeurs de  $\theta$  :

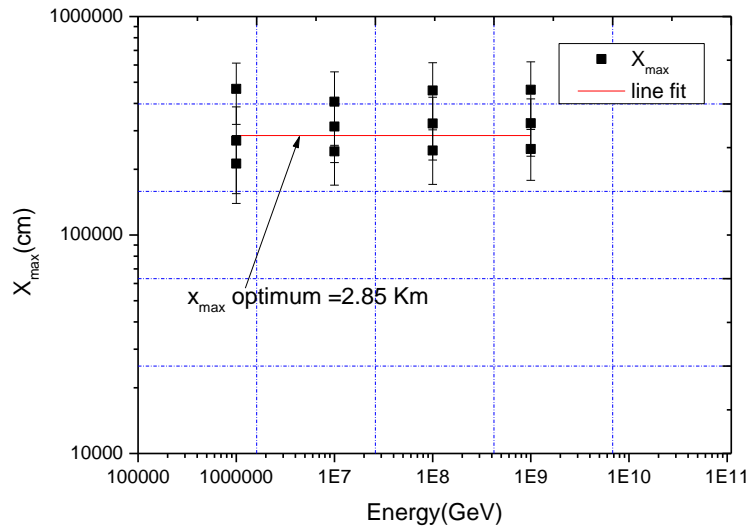

| Energy(GeV) | $L'_{max}$ ( $X_{max}$ ) (km) | $\sigma$ (Km) |
|-------------|-------------------------------|---------------|
| 1000000     | 212337,23629                  | 72862,05535   |
| 1E7         | 241488,20382                  | 72282,05568   |
| 1E8         | 243525,10682                  | 73118,24938   |
| 1E9         | 247661,78424                  | 69644,98519   |
| 1000000     | 270329,5841                   | 115658,74176  |
| 1E7         | 313636,31492                  | 98996,76384   |
| 1E8         | 323771,83869                  | 103358,36631  |
| 1E9         | 324721,06939                  | 95311,39114   |

|         |              |              |
|---------|--------------|--------------|
| 1000000 | 466363,57005 | 145447,54864 |
| 1E7     | 407733,22178 | 150339,20542 |
| 1E8     | 458659,47915 | 155640,70873 |
| 1E9     | 462224,91087 | 157999,6699  |
|         |              |              |

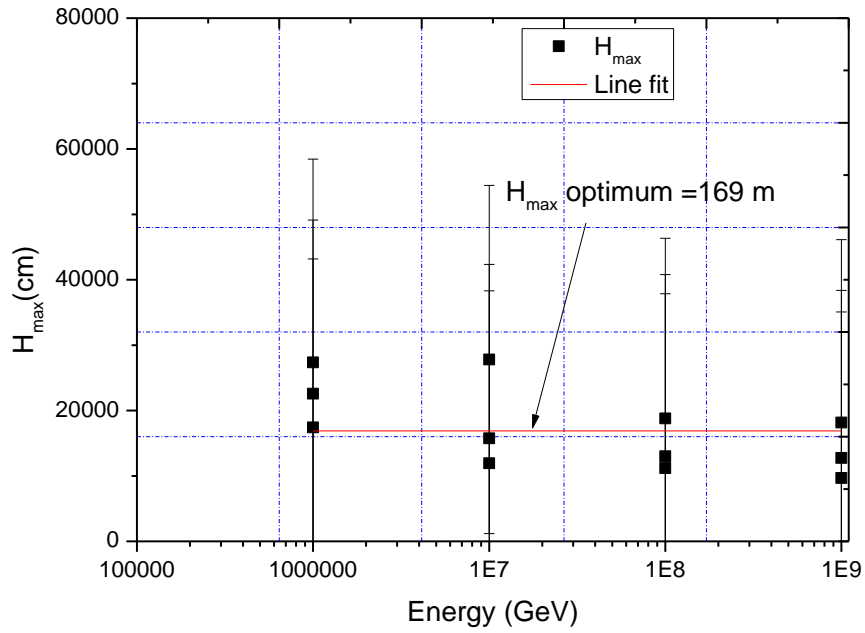

| Energie(GeV) | Xmax(Km)    | $\sigma$ (Km) |
|--------------|-------------|---------------|
| 1000000      | 22567,49618 | 26570,73744   |
| 1E7          | 11936,96015 | 26359,22792   |
| 1E8          | 11194,15905 | 26664,16419   |
| 1E9          | 9685,62942  | 25397,56265   |
| 1000000      | 27374       | 31072,94342   |
| 1E7          | 15739,18904 | 26596,52694   |
| 1E8          | 13016,17345 | 27768,31755   |

|         |             |             |
|---------|-------------|-------------|
| 1E9     | 12761,15259 | 25606,41262 |
| 1000000 | 17428       | 25752,49582 |
| 1E7     | 27808,90922 | 26618,59753 |
| 1E8     | 18792,06265 | 27557,26541 |
| 1E9     | 18160,77827 | 27974,93582 |
|         |             |             |

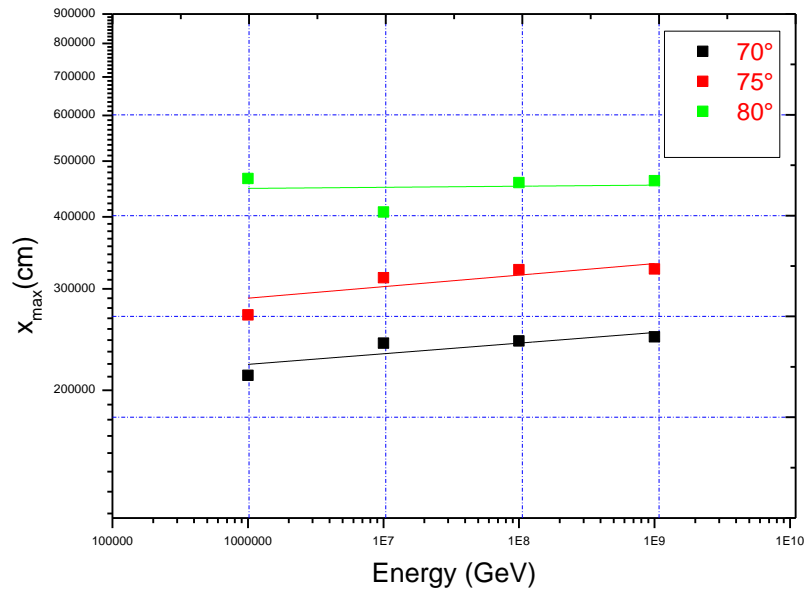

| Energie(GeV) | Angle 80°    | Angle 75°    | Angle 70°    |
|--------------|--------------|--------------|--------------|
| 1000000      | 466363,57005 | 270329,5841  | 212337,23629 |
| 1E7          | 407733,22178 | 313636,31492 | 241488,20382 |
| 1E8          | 458659,47915 | 323771,83869 | 243525,10682 |
| 1E9          | 462224,91087 | 324721,06939 | 247661,78424 |
